# Supplementary material for: Understanding Consumers’ Purchase Intentions in Social Commerce through Social Capital: Evidence from SEM and fsQCA
Source: MDPI journal article supplement (doi:10.3390/jtaer16050087), 2021-05-12
Supplement: s1 [file s1]

Table S1: Measurements

| Measurements                                                                                |
|---------------------------------------------------------------------------------------------|
| Social interaction Chiu et al. (2006) [67]                                                  |
| SI1: I maintain close social relationships with some peers in WeChat.                       |
| SI2: I spend a lot of time interacting with some peers in WeChat.                           |
| SI3: I have frequent communication with some peers in WeChat.                               |
| Trust in peers Chang and Chuang (2011) [17]                                                 |
| TR1: Peers in WeChat do not take advantage of others even when an opportunity arises.       |
| TR2: Peers in WeChat always keep promises they make to one another.                         |
| TR3: Peers in WeChat would not knowingly do anything to disrupt the conversation.           |
| TR4: Peers in WeChat are truthful in dealing with one another.                              |
| Reciprocity Pai and Tsai (2016) [85]                                                        |
| RE1: I know that WeChat peers will help me, so it's only fair to help them.                 |
| RE2: I believe that WeChat peers will help me if I need it.                                 |
| RE3: When I receive help on WeChat, I feel it is only right to give back and help others.   |
| Shared language Chiu et al. (2006) [67]                                                     |
| SI1: Peers in WeChat use common terms or jargons.                                           |
| SI2: Peers in WeChat use understandable communication pattern during the discussion.        |
| SI3: Peers in WeChat use understandable narrative forms to post messages.                   |
| Purchase intention Liang et al. (2011) [86]                                                 |
| INT1: I will consider the shopping experiences of peers in WeChat when I want to shop.      |
| INT2: I will ask peers in WeChat to provide me with their suggestions before I go shopping. |
| INT3: I am willing to buy the products recommended by peers in WeChat.                      |
